# Supplementary material for: Elevated Preoperative NMPR Predicts an Unfavorable Chance of Survival in Resectable Esophageal Squamous Cell Carcinoma
Source: MDPI journal article supplement (doi:10.3390/medicina58121808), 2022-12-08
Supplement: s1 [file s1]

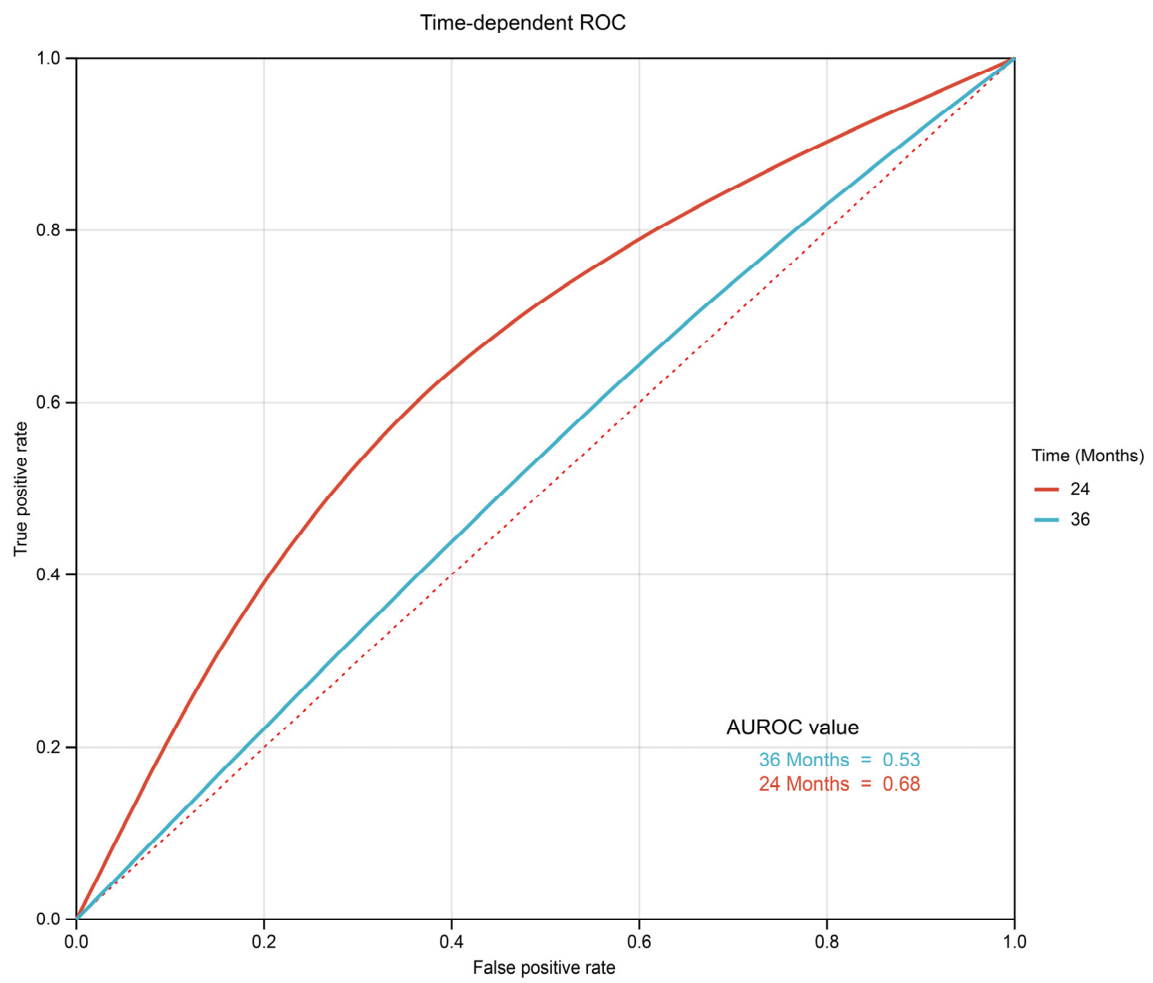

**Figure S1.** Predictive ability of NMPR in resectable esophageal squamous cell carcinoma by ROC curves in 24 months and 36 months in the validation cohort. NMPR, neutrophil–mean-platelet-volume–platelet ratio.
